# An empirically-driven guide on using Bayes Factors for M/EEG decoding

Lina Teichmann<sup>1\*</sup>, Denise Moerel<sup>2</sup>, Chris Baker<sup>1</sup>, Tijl Grootswagers<sup>3</sup>

<sup>1</sup> Laboratory of Brain and Cognition, National Institute of Mental Health, Bethesda, MD, USA

<sup>2</sup> Department of Cognitive Science, Macquarie University, Sydney, Australia

<sup>3</sup> The MARCS Institute for Brain, Behaviour & Development, Western Sydney University, Sydney, Australia

\*Corresponding author: [lina.teichmann@nih.gov](mailto:lina.teichmann@nih.gov)

**Acknowledgements:** This research was supported (in part) by the Intramural Research Program of the NIMH (ZIAMH002909).

## Abstract

Bayes Factors can be used to provide quantifiable evidence for contrasting hypotheses and have thus become increasingly popular in cognitive science. However, Bayes Factors are rarely used to statistically assess the results of neuroimaging experiments. Here, we provide an empirically-driven guide on implementing Bayes Factors for time-series neural decoding results. Using real and simulated Magnetoencephalography (MEG) data, we examine how parameters such as the shape of the prior and data size affect Bayes Factors. Additionally, we discuss benefits Bayes Factors bring to analysing multivariate pattern analysis data and show how using Bayes Factors can be used instead or in addition to traditional frequentist approaches.

## 32 1. Introduction

33 Bayes Factors provide an attractive alternative to the more traditional null hypothesis statistical  
34 testing (NHST) framework. In particular, the use of Bayes Factors allows us to differentiate  
35 between the amount of evidence for one theory over another in an intuitive way and sample  
36 data without a strict sampling plan (Keyesers et al., 2020; Wagenmakers et al., 2018). The  
37 newfound popularity of Bayes Factors in cognitive science has not yet extended into cognitive  
38 neuroscience, partly because there are no standard implementations. Here, we will provide a  
39 data-driven guide on how Bayes Factors can be used in cognitive neuroscience, using an  
40 example multivariate classification analysis of Magnetoencephalography (MEG) data.

41  
42 Multivariate classification analyses have become a standard tool in analysing time-series  
43 neuroimaging data (Carlson et al., 2019; Contini et al., 2017; Grootswagers et al., 2017;  
44 Pantazis, 2020). To apply classification to time-series neural data, activation patterns are  
45 extracted across MEG sensors and classification analyses are used to test whether a given  
46 stimulus feature is represented in the neural data (see Figure 1 for an example). Across  
47 participants, we can then test whether there is information in the signal by statistically  
48 assessing whether classification accuracy is above chance. Under the null hypothesis the  
49 sample mean equals chance decoding and under the alternative hypothesis the sample mean  
50 is larger than chance decoding. Currently, NHST and p-values are the de-facto method of  
51 choice when assessing whether decoding is above chance. However, recent studies have  
52 started using Bayes Factors to assess classification accuracies (Grootswagers, Robinson, &  
53 Carlson, 2019b; Grootswagers, Robinson, Shatek, et al., 2019; e.g., Grootswagers et al.,  
54 2021; Kaiser et al., 2018; Mai et al., 2019; Proklova et al., 2019; Robinson et al., 2019, 2021).  
55 In this paper, we focus on how Bayes Factors can be used to assess whether classification  
56 accuracy is above-chance or at-chance. The Bayesian framework of hypothesis testing  
57 involves directly comparing the predictions of two hypotheses (Jeffreys, 1939, 1935). Bayes  
58 Factors describe the probability of one hypothesis over the other given the observed data. In  
59 the multivariate pattern analysis (MVPA) context, this means we would use Bayes Factors to  
60 test the probability of above-chance classification versus at-chance classification given the  
61 classification results across participants at each timepoint.

62  
63 The Bayesian approach brings several advantages (Dienes, 2011, 2014, 2016b; Keyesers et  
64 al., 2020; Morey et al., 2016; Wagenmakers et al., 2018). First, when calculating Bayes  
65 Factors, two hypotheses are tested simultaneously. For time-series classification analyses, it  
66 allows us to contrast evidence for above-chance versus at-chance decoding directly. In

67 addition, Bayes Factors are a measure of strength of evidence for one hypothesis versus  
68 another which means we can *directly* assess how much evidence we have for above-chance  
69 versus at-chance decoding at a given timepoint. This makes the interpretation of statistical  
70 results more intuitive, as multiple Bayes Factors can be compared directly with larger numbers  
71 reflecting more evidence. Another advantage is that Bayes Factors can be calculated  
72 iteratively while more data are being collected and that testing can be stopped when there is  
73 a sufficient amount of evidence. Such stopping-rules could be accompanied by a pre-specified  
74 acquisition plan and potentially an (informal) preregistration via portals such as the Open  
75 Science Framework (Foster & Deardorff, 2017). Using the data to determine when enough  
76 evidence has been collected is particularly relevant for neuroimaging experiments, as it might  
77 significantly reduce research costs and reduce the risk of having underpowered studies. Thus,  
78 using a Bayesian approach to statistically assess time-series classification results can be  
79 beneficial both from a theoretical as well as an economical standpoint and might ease the  
80 ability to interpret and communicate scientific findings.

81  
82 While there are clear advantages to using Bayes Factors for time-series decoding studies,  
83 incorporating Bayes Factors into existing decoding pipelines may seem daunting. The goal of  
84 the current paper is to present an empirically-driven guide to using Bayes Factors for  
85 assessing time-series neuroimaging classification results. We present a practical example  
86 based on a previously published time-series decoding study (Teichmann et al., 2019) and will  
87 present results from simulations to show the influence of certain parameters on Bayes Factors.  
88 We make use of the established Bayes Factor R package (Morey et al., 2015) to calculate the  
89 Bayes Factors but provide sample codes along with this paper showing how to access the  
90 Bayes Factor R package via Matlab and Python  
91 ([https://github.com/LinaTeichmann1/BFF\\_repo](https://github.com/LinaTeichmann1/BFF_repo)). We also show how the Bayes Factors in our  
92 example compare to p-values. Based on empirical evidence, we will give recommendations  
93 for Bayesian analysis applied to M/EEG classification results. The aim of this paper is to  
94 provide a broad introduction to Bayes Factors from a viewpoint of time-series neuroimaging  
95 decoding. We aim to do so without going into the technical or mathematical detail, and instead  
96 provide pointers to relevant literature on the specifics.

97

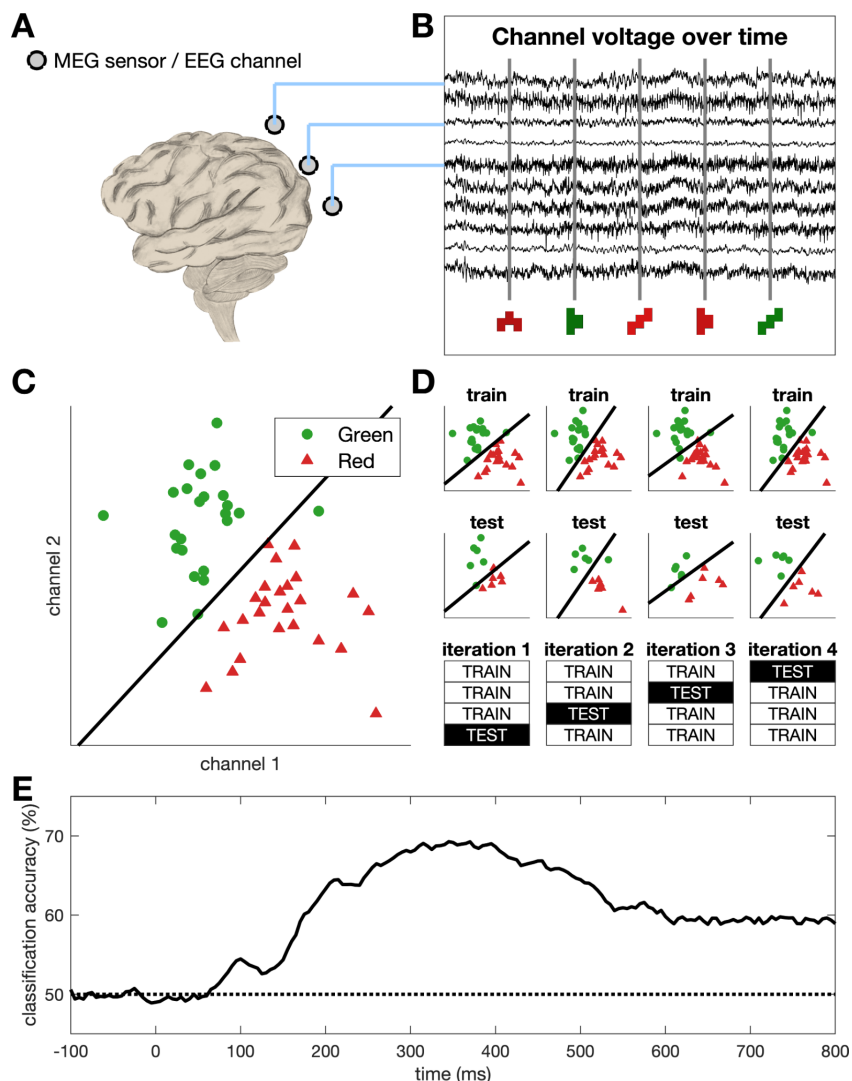

98

99 **Figure 1. Overview of MVPA for time-series neural data with simulated data.** (A) Example  
 100 MEG sensors / EEG channels. (B) Simulated time-series neuroimaging data for a few  
 101 sensors/channels. Vertical lines show stimulus onsets with example stimuli plotted below.  
 102 Data is first epoched from -100 to 800 ms relative to stimulus onset, resulting in multiple time-  
 103 series chunks associated with seeing a red or a green shape. (C) Using the epoched data, we  
 104 can extract the sensor/channel activation pattern across the different sensors/channels (only  
 105 2 displayed for simplicity) for every trial at every timepoint. Then a classifier (black line) is  
 106 trained to differentiate between the activation patterns evoked by red and green trials. (D)  
 107 Example of a 4-fold cross validation where the classifier is trained on three quarters of the  
 108 data and tested on the left-out quarter. This process is repeated at every timepoint. (E) We  
 109 can calculate how often the classifier accurately predicts the colour of the stimulus at each  
 110 timepoint by averaging across all testing folds. Theoretical chance level is 50% as there are  
 111 two conditions in the simulated data (red and green). During the period before stimulus onset,  
 112 we expect decoding to be at chance, and thus the baseline period can serve as a sanity check.

113

## 114 2. Methods & Results

### 115 2.1 Example dataset & inferences based of Bayes Factors

116 The aim of the current paper is to show how to use Bayes Factors when assessing time-series  
117 neuroimaging classification results and test what effect different analysis parameters have on  
118 the results. We have used a practical example of previously published MEG data (Teichmann  
119 et al., 2019), which we re-analysed using Bayes Factors. In the original experiment, eighteen  
120 participants viewed coloured shapes and grayscale objects in separate blocks while the neural  
121 signal was recorded using MEG. Here, we only considered the coloured shape trials ("real  
122 colour blocks", 1600 trials in total). Identical shapes were coloured in red or green and were  
123 shown for 100 ms followed by an inter-stimulus-interval of 800-1100 ms. The data was  
124 epoched from -100 ms to 800 ms (200 Hz resolution) relative to stimulus onset and a linear  
125 classifier was used to differentiate between the neural responses evoked by red and green  
126 shapes. A 5-fold cross-validation was used with the classifier being trained on 80% of the data  
127 and tested on the remaining 20%. This classification analysis resulted in decoding accuracies  
128 over time for each participant. In the original study, permutation tests and cluster-corrected p-  
129 values were used to assess decoding accuracies as implemented in CoSMoMVPA (Oosterhof  
130 et al., 2016). Here, we calculated Bayes Factors instead and examined how parameter  
131 changes affected the results.

132  
133 When running statistical tests on classification results, we are interested in whether decoding  
134 accuracy is above-chance at each timepoint. To test this, we can use permutation tests to  
135 establish whether there is enough evidence to reject  $H_0$  which states that decoding is equal to  
136 chance. If there is enough evidence we can reject  $H_0$  and conclude that decoding is different  
137 from chance. Given that below-chance decoding accuracies are not meaningful, we usually  
138 are interested only in above-chance decoding (directional hypothesis). In contrast to the  
139 frequentist approach, Bayes Factors quantify how much the plausibility of two hypotheses  
140 changes, given the data (see e.g., Ly et al., 2016). Here, we ran a Bayesian t-test of Bayes  
141 Factor R package (Morey et al., 2015) at each timepoint, testing whether the data is more  
142 consistent with  $H_a$  (decoding is larger than chance) over  $H_0$  (decoding is equal to chance).  
143 The resulting Bayes Factors center around 1 with numbers smaller than 1 representing  
144 evidence for  $H_0$  and numbers larger than 1 representing evidence for  $H_a$ . In contrast to p-  
145 values, Bayes Factors are directly interpretable and comparable (cf. Keyser et al., 2020;  
146 Morey et al., 2016; Wagenmakers et al., 2016). That is a Bayes Factor of 10 means that it is  
147 10 times more likely the data came from  $H_a$  as opposed to  $H_0$ . Similarly a Bayes Factor of 1/10  
148 means that it is 10 times more likely the data came from  $H_0$  as opposed to  $H_a$ . Thus, in the

149 context of time-series decoding, Bayes Factors allow us to directly assess whether and how  
 150 much evidence there is at a given timepoint for the alternative over the null hypothesis and  
 151 *vice versa* (Figure 2C).  
 152

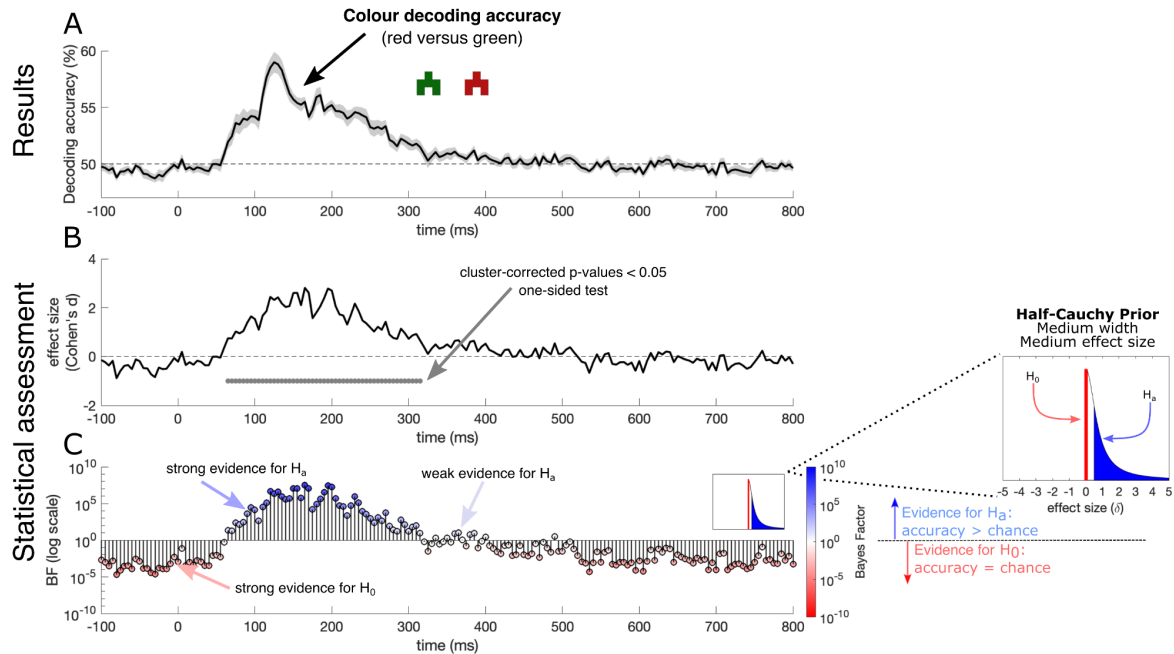

153  
 154 **Figure 2. Decoding results of our practical example dataset with statistical**  
 155 **assessments.** (A) Colour decoding over time (black line). The dashed line shows theoretical  
 156 chance decoding (50%). The grey shaded area represents the standard error across  
 157 participants. (B) Effect size over time with the cluster-corrected p-values at each timepoint  
 158 printed below in grey. (C) Bayes Factors over time for this dataset on a logarithmic scale. Blue,  
 159 upwards pointing stems indicate evidence for above-chance decoding and red, downwards  
 160 pointing stems show evidence for at-chance decoding at every timepoint. We used a hybrid  
 161 one-sided model comparing evidence for above-chance decoding versus a point-nil at  $\delta = 0$   
 162 (no effect). For the alternative hypothesis, we used a half-cauchy prior with medium width ( $r =$   
 163  $0.707$ ) covering an interval from  $\delta = 0.5$  to  $\delta = \infty$ . The half-cauchy prior assumes that small  
 164 effect sizes are more likely than large ones but the addition of the interval deems very small  
 165 effects  $\delta < 0.5$  as irrelevant. During the baseline period (i.e., before stimulus onset), the Bayes  
 166 Factors strongly support the null hypothesis, confirming the sanity check expectation.  
 167

## 168 2.2 Adjusting the prior range to account observed chance decoding

169 Bayes Factors represent the plausibility that the data emerged from one hypothesis compared  
 170 to another. In the example dataset, the two hypotheses are that decoding is at chance (i.e.,  
 171 H<sub>0</sub>, no colour information present) or that decoding is above chance (i.e., H<sub>a</sub>, colour  
 172 information present). To deal with the fact that observed decoding can be different than the  
 173 theoretical chance level, we can adjust the prior range of the alternative hypothesis to allow  
 174 for small effects under the null hypothesis (Rouder et al., 2009). The prior range (called “null  
 175 interval” in the R package) is defined in standardized effect sizes and consists of a lower and  
 176 upper bound. To incorporate the differences between observed and theoretical chance level,

177 we can define a range of relevant effect sizes for the alternative hypothesis, for example, from  
178  $\delta = 0.5$  to  $\delta = \infty$ . To determine which values are reasonable as the lower bound of this interval,  
179 we changed the prior range systematically and examined the effect on the resulting Bayes  
180 Factors (Figure 3). We found that smaller lower bounds at  $\delta = 0$  and  $\delta = 0.2$  resulted in weaker  
181 evidence supporting the null hypothesis than ranges starting at  $\delta = 0.5$  and  $\delta = 0.8$ . The range  
182 did not have a large effect on timepoints with strong evidence for  $H_a$ . The effect of changing  
183 the prior range is larger for the null hypothesis than the alternative as chance decoding is not  
184 exactly 50% but distributed around chance. Changing the lower bound of the prior range  
185 means that the effects that are just larger than  $\delta = 0$  can support the null hypothesis. Thus,  
186 the results here demonstrate that we can compensate for the differences between theoretical  
187 and observed chance by adjusting the prior range and effectively considering small effect sizes  
188 as evidence for the null hypothesis rather than the alternative.  
189

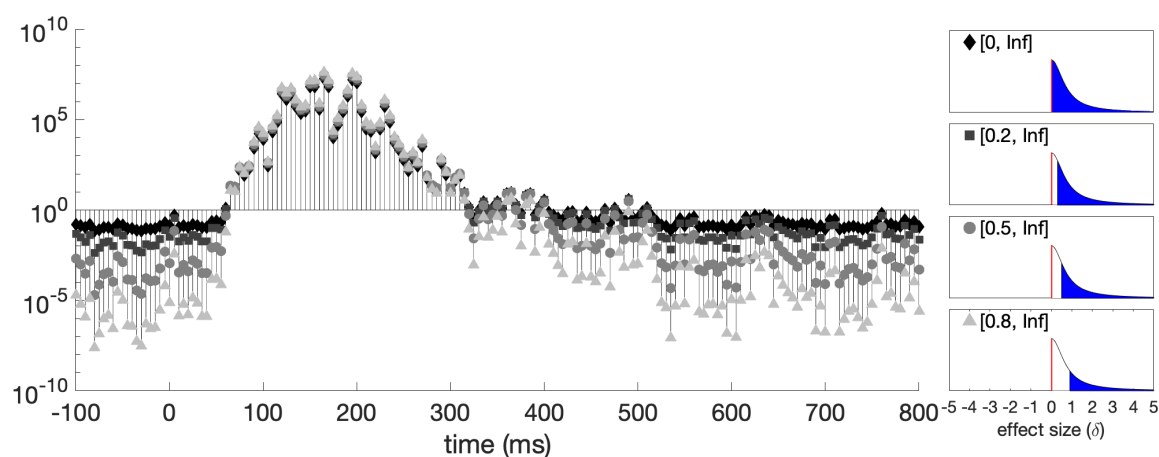

190  
191 **Figure 3. The effect of changing the prior range (null interval) on Bayes Factors in our**  
192 **example data.** Intervals starting at larger effect sizes led to more timepoints showing  
193 conclusive evidence for  $H_0$ . This is due to the fact that theoretical and observed chance levels  
194 are not the same. The panels on the right show the prior distributions with the different null  
195 intervals.  
196

197 To further examine what a reasonable lower bound of the prior range is, we looked at effect  
198 sizes observed during the baseline window (before stimulus onset) in a selection of our  
199 previous studies (Grootswagers et al., 2021; Grootswagers, Robinson, & Carlson, 2019a;  
200 Moerel, Grootswagers, et al., 2021; Moerel, Rich, et al., 2021; Teichmann et al., 2018, 2020).  
201 Using the baseline window allows us to quantify the difference between theoretical and  
202 observed chance, as we do not expect any meaningful effects before stimulus onset (e.g.,  
203 stimulus colour is not decodable before the stimulus is presented). Thus, the baseline period  
204 can effectively tell us which effect sizes can be expected by chance. Across our selection of  
205 previous studies, we found an average maximum effect size of  $\delta = 0.39$  before stimulus onset

206 and an average maximum effect size of  $\delta = 1.91$  after stimulus onset (Figure 4). This survey  
207 shows that effect sizes as large as  $\delta = 0.5$  can be observed when when no meaningful  
208 information is in the signal. Thus, this supports the conclusions from the example dataset  
209 showing that prior ranges with a lower bound of  $\delta = 0.5$  may be a sensible choice when using  
210 Bayes Factors to examine time-series M/EEG decoding results.  
211

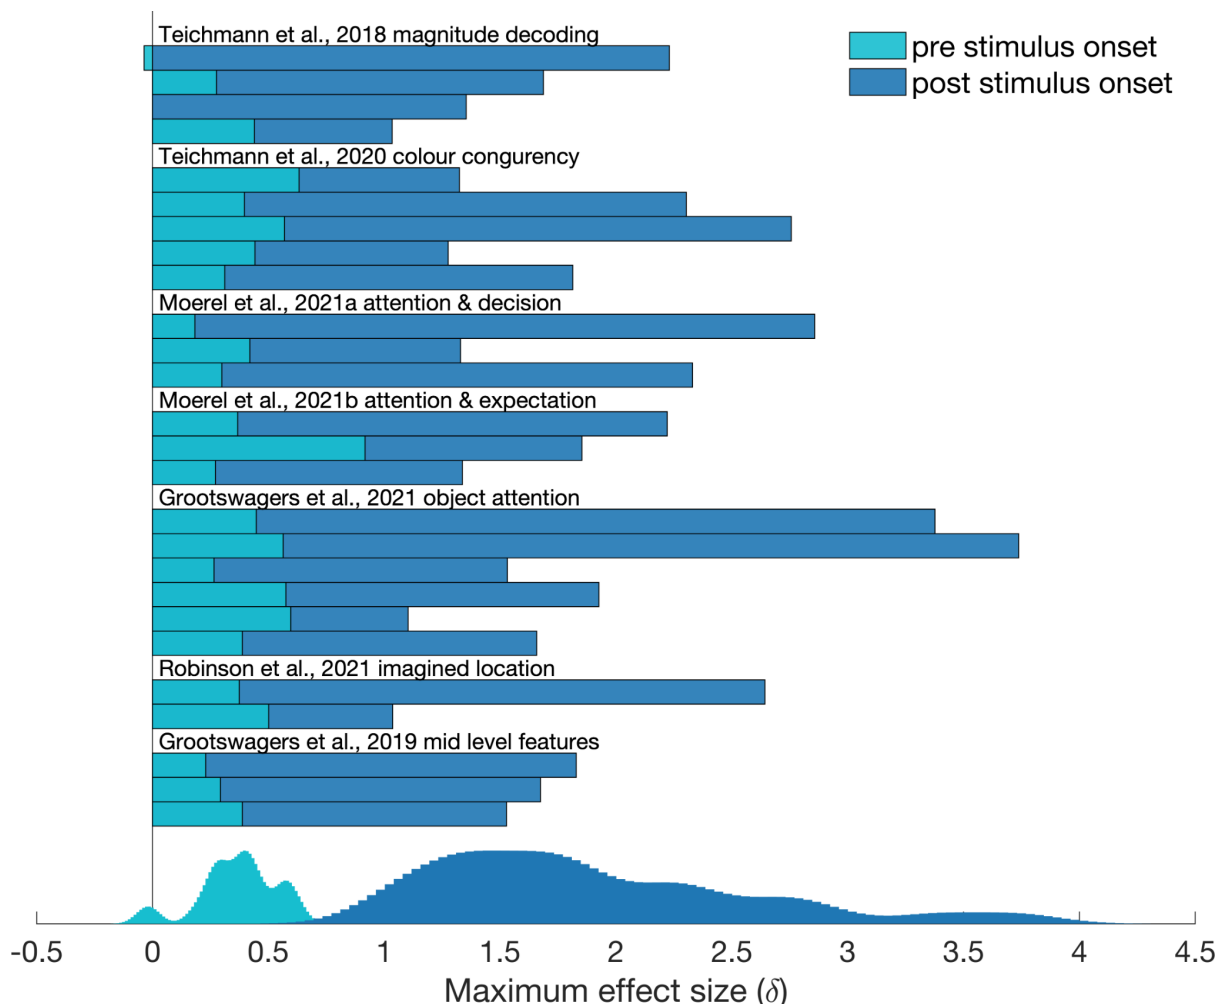

212  
213 **Figure 4. Estimated maximum effect sizes during baseline and after stimulus onset for**  
214 **prior studies using visual stimuli.** These estimations show that a reasonable range for  $H_a$   
215 would start at  $\delta = 0.5$  or above, as during baseline decoding accuracies corresponding to  
216 standardized effect sizes as high as  $\delta = 0.5$  were observed.  
217



### 218 2.3 Changing the prior width to capture different effect sizes

219 Another feature that can be changed in the Bayesian t-test is the width of the half-Cauchy  
220 distribution (referred to as r-value in the Bayes Factor Package). Small r-values create a  
221 narrower, sharply peaking distribution, whereas larger values make the distribution wider with  
222 a prolonged peak. Standard prior widths incorporated in the Bayes Factor R package are  
223 medium (r = 0.707), wide (r = 1), and ultrawide (r = 1.414). Keeping the prior range consistent  
224 ([0.5, Inf]) while using the three prior widths implemented into the R Bayes Factor Package  
225 (medium = 0.707; wide = 1; ultrawide = 1.414). We found that changing the width of the  
226 Cauchy prior did not have a pronounced effect on the Bayes Factors (Figure 5). In our specific  
227 example, this is probably the case because the effect sizes quickly rose to  $\delta > 2$  (Figure 2b)  
228 which means that the subtle differences between the different prior widths do not have a  
229 substantial effect on the likelihood of the data arising from  $H_a$  over  $H_0$ . Thus, using the default  
230 prior width (r = 0.707) for the decoding context seems like a reasonable choice.

231

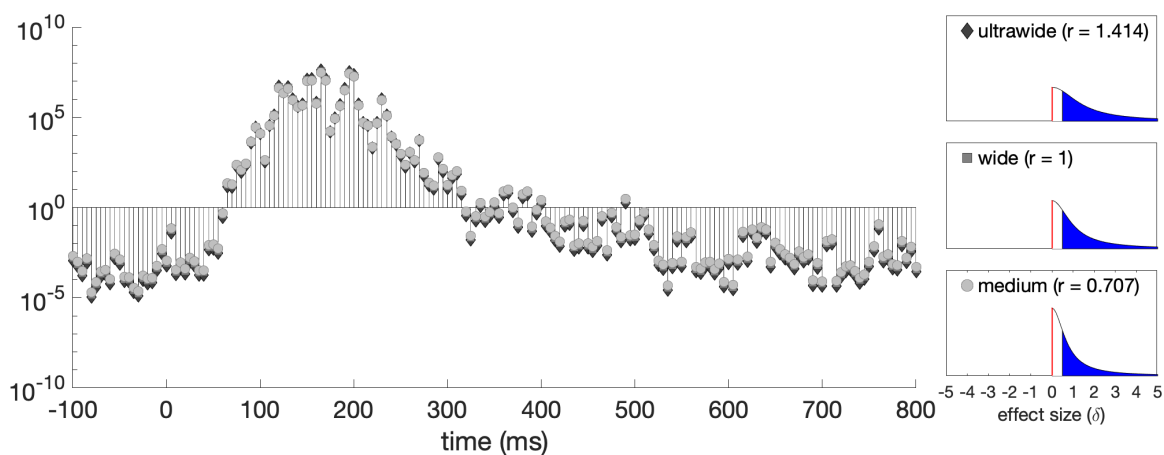

232

233 **Figure 5. Bayes Factors over time for the example data set when the prior width is**  
234 **changed.** The width of the prior had no pronounced effect on the Bayes Factors we calculated.  
235 The panels on the right show the prior distributions with the different widths.

236

### 237 2.4 The effect of data size on statistical inferences

238 In a lot of cases, there are financial and time limits on how many participants can be tested  
239 and for how long. To obtain an estimate of how much data is needed to draw conclusions and  
240 avoid ending up with underpowered studies, we used the example dataset and reduced the  
241 data size for analysis. As classification analyses are usually run at the subject level but  
242 statistical assessment is run at the group level, we tested how changing data size both by trial  
243 numbers and participant numbers influences Bayes Factors in the time-series decoding  
244 context (Figure 6). In the original example dataset, the classifier was trained on 1408 trials  
245 and tested on 352 trials (5-fold cross-validation). There were five different shapes in the red  
246 and the green condition (160 repetitions for each coloured shape) and the cross-validation

247 schema was based on leaving all trials of one shape out for testing. Statistical inferences were  
248 drawn on the group level which contained data from 18 participants. To examine the effect of  
249 data size (and effectively noise level) on the Bayes Factor calculations, we re-ran the analysis  
250 reducing the data size first by subsampling from the trials each participant completed, retaining  
251 1200 (75%), 800 (50%), 400 (25%), and 160 (10%) trials. We cross-validated in the same way  
252 as in the original paper, with the only difference being how many trials of each shape were  
253 included. In addition, we subsampled from the whole group, retaining data from the first 6, 12,  
254 or all 18 participants and re-ran the statistical analysis. We then compared the results from  
255 the reduced-size colour datasets using Bayes Factors and cluster-corrected p-values<sup>1</sup>.

256  
257 Overall, our analyses highlight that we need to have a large enough number of trials and a  
258 large enough number of participants to draw firm conclusions about our time-resolved  
259 decoding results. Testing more participants resulted in stronger evidence for  $H_a$  and  $H_0$ , with  
260 fewer timepoints in the inconclusive range (Bayes Factors) and more significant above-chance  
261 decoding timepoints (p-values). Similarly, running the classification with more trials, led to  
262 more timepoints with large Bayes Factors supporting  $H_a$  and more above-chance decoding  
263 timepoints. However, one of the key advantages of using Bayes Factors instead of p-values  
264 is that we can potentially obtain a good idea of how many trials are needed even if we run a  
265 pilot experiment with a limited number of participants. A reasonable strategy would be to  
266 overpower the subject-level data (i.e., number of trials) for the pilot sample and then sub-  
267 sample to explore how many trials are needed. In our example, we can see that the amount  
268 of evidence for  $H_a$  at peak decoding is not sufficient when we only use 160 trials (10% of the  
269 original sample), regardless of the number of subjects. Increasing the trials to 400 or 800 (25%  
270 or 50% of the original sample) leads to similar conclusions as using all 1600 trials. As Bayesian  
271 statistics allow for sequential sampling, we could collect data from more participants until a  
272 criterion is reached. The data here suggest that insufficient data at the subject-level ultimately  
273 leads to inconclusive evidence, highlighting that a large number of trials is just as, if not more  
274 important, than large numbers of participants.

275

---

<sup>1</sup> In comparison to the original paper, we did not use trial label permutations. Instead, we performed sign-flip permutations (which reduces the computational time) as implemented in CoSMoMVPA to generate the null distribution.

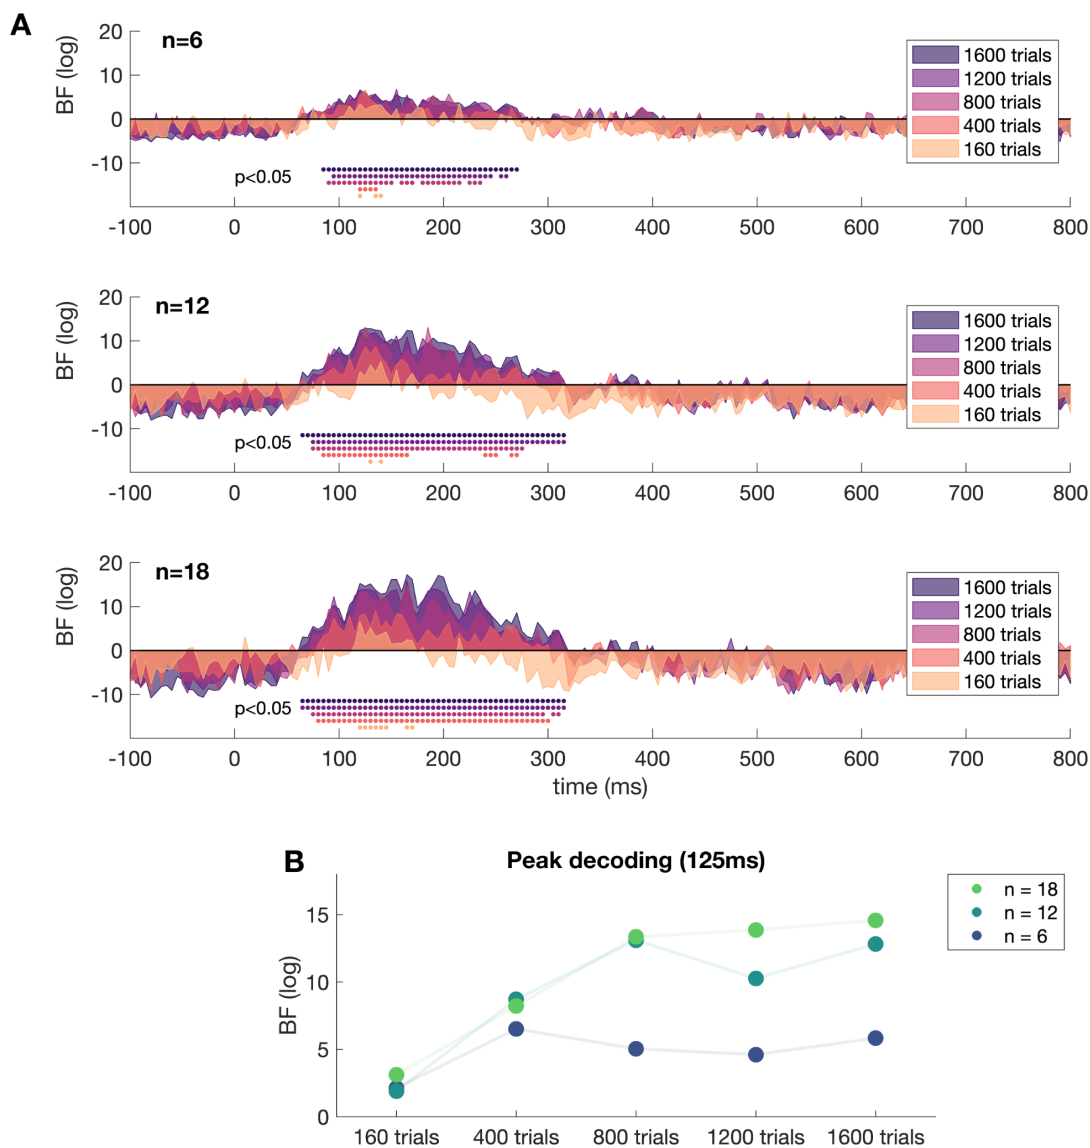

276

277

278 **Figure 6. Results of colour MEG decoding, using a limited number of trials and**  
279 **participant data to simulate a piloting scenario. (A) The first three plots show Bayes**  
280 **Factors over time along with cluster-corrected p-values. The colour in all plots reflects the**  
281 **number of trials used to train and test the classifier. (B) Compares Bayes Factors at peak**  
282 **decoding (125ms) for the different data sizes.**

283

284

285 In addition to manipulating data size, we also simulated larger datasets with fixed effect sizes  
286 between  $\delta = 0$  and  $\delta = 1$  and examined the interaction of sample size with different prior ranges  
287 (Figure 7). We simulated 1000 datasets with specific effect sizes for each sample size and  
288 calculated the Bayes Factors. We then calculated the median Bayes Factor for each sample-  
289 and effect size combination to show how prior range choices interact with the possibility of  
290 finding evidence for effects of different sizes. Specifically, we compared a prior range of 0.5 to  
291 infinity (Figure 7A) to a prior range of zero to infinity (Figure 7B). When specifying the prior  
292 range to 0.5 to infinity (Figure 7A), our results show that particularly small effect sizes lead to  
293 substantial evidence for  $H_0$  faster, while particularly large effect sizes lead to substantial  
294 evidence for  $H_a$  faster. In these cases, large sample sizes were not needed to draw solid  
295 conclusions. In contrast, if the effect size fell in between the specified ranges for the prior of  
296  $H_a$  and  $H_0$  (i.e., between 0 and 0.5), we found that small sample sizes in particular tended to  
297 result in inconclusive Bayes Factors neither supporting  $H_a$  or  $H_0$ . However, if the sample size  
298 increased, the confidence that small effects were “real” also increased and therefore resulted  
299 in stronger confidence supporting one of the hypotheses. Importantly, however, large sample  
300 sizes did not automatically lead to an interpretable Bayes Factor if the effect was truly in  
301 between the specified prior ranges of  $H_a$  and  $H_0$ , indicating that sampling strategy had no  
302 effect on Bayes Factors. Consistent with our results for the example data, the simulations also  
303 showed that changing the range of the prior has a strong effect on finding substantial evidence  
304 for  $H_0$ . If the prior range for the alternative is specified to start at zero (Figure 7B), it was almost  
305 impossible to find any evidence for  $H_0$ , even if the effect size was truly zero. Thus, the  
306 simulations show that defining the prior range with a gap between effects expected under  $H_0$   
307 and  $H_a$  is critical and that more data leads to larger Bayes Factors, but only if there is a true  
308 underlying effect.

309

310

311

312

### A With interval

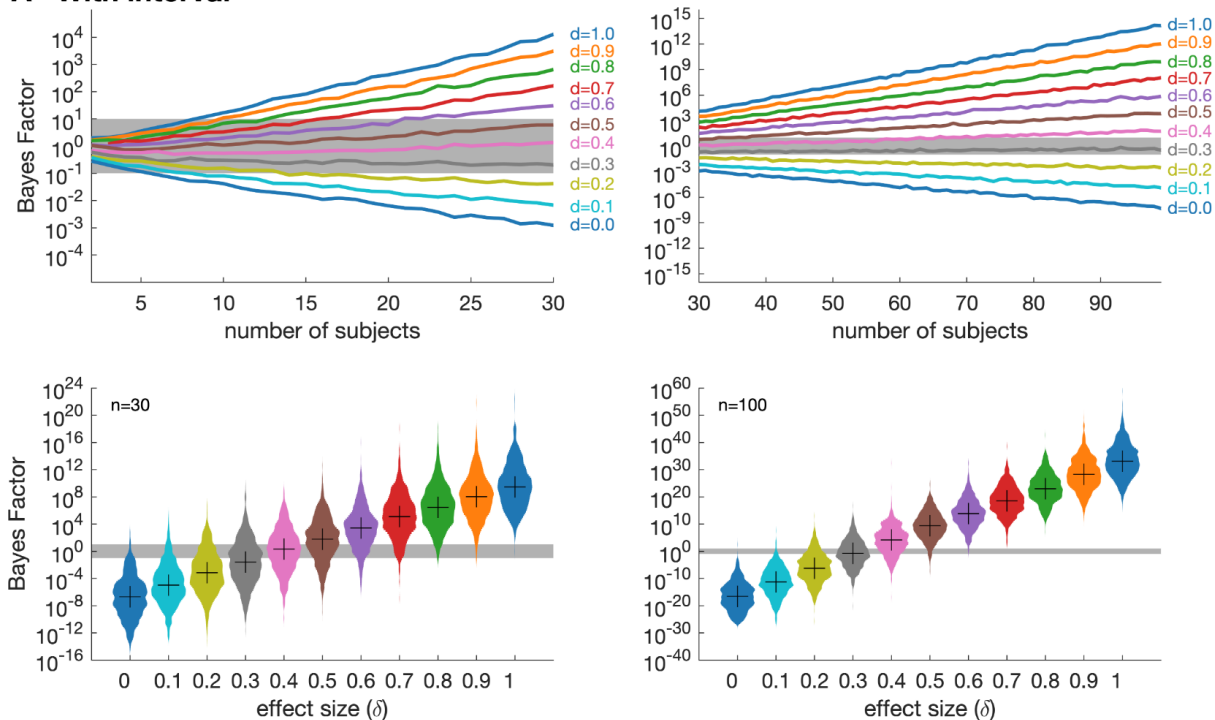

### B Without interval

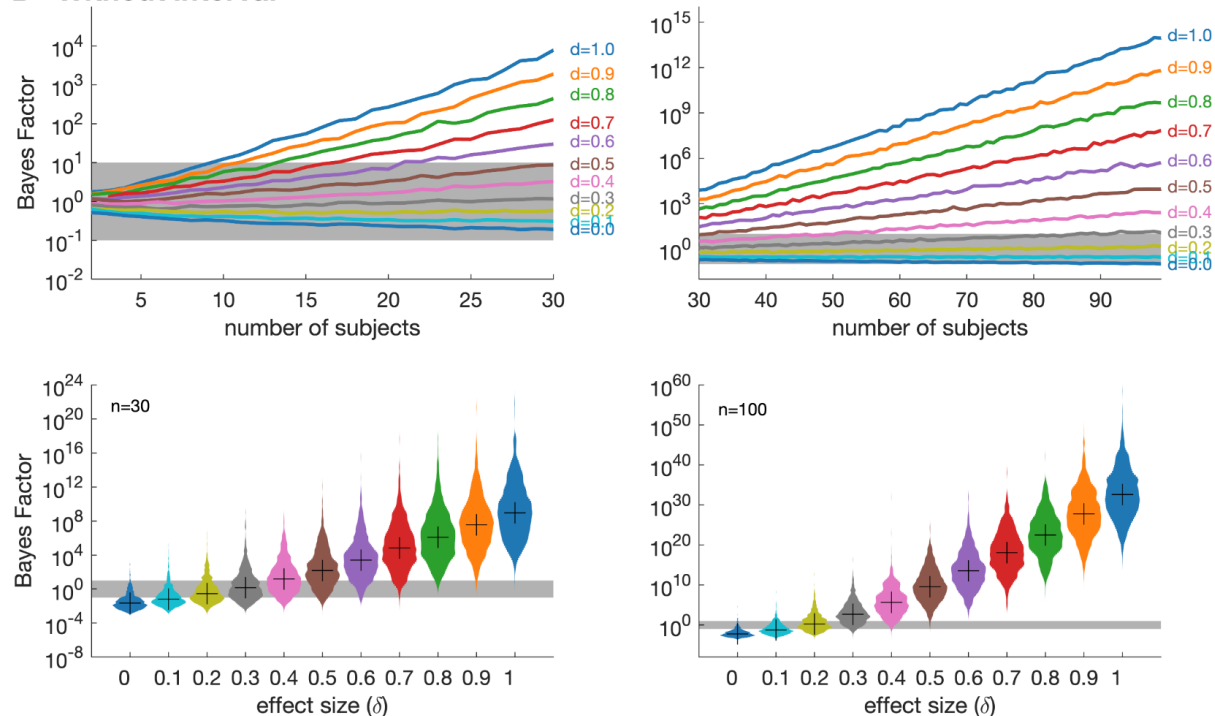

313

314 **Figure 7. Simulated data varying effect sizes and numbers of participants.** (A) Bayes  
 315 Factors obtained using a half-cauchy with an interval  $[0.5, \infty]$ . (B) Bayes Factors obtained  
 316 using a half-cauchy without an interval. The first and third rows show the median Bayes  
 317 Factors of 1000 simulations as a function of the number of participants. The second and fourth  
 318 rows show the distribution (violin plots) of the 1000 simulations at varying effect sizes using  
 319  $n=30$  (left panels) and  $n=100$  (right panels), with the black cross indicating the median. Note  
 320 the different scales on the y-axis between panels.

## 321 Discussion

322 Bayes Factors have seen a recent increase in popularity in cognitive science, as they can be  
323 used to provide quantifiable evidence for contrasting hypotheses. However, their uptake has  
324 to date been slow for neuroimaging experiments. To facilitate their adoption, we have provided  
325 an empirically-driven guide on implementing Bayes Factors for time-series neuroimaging  
326 decoding, using both real and simulated data. We showed that using Bayes Factors and  
327 cluster-corrected p-values lead to similar results when statistically assessing time-series  
328 neuroimaging decoding results. However, the key advantages of using Bayes Factors are the  
329 ability to compare evidence for  $H_a$  with evidence for  $H_0$  and having results that are quantifiable  
330 (e.g., Dienes, 2014; Wagenmakers et al., 2016). Our results show that for time-series  
331 decoding data, half-Cauchy priors with default width and an interval ranging from effect sizes  
332 of 0.5 to infinity provide sensible results. We also show that even a small number of  
333 participants can yield informative Bayes Factors, which can be useful for making decisions on  
334 experimental design parameters (e.g., number of trials) during piloting stages of a study.

335  
336 Our results showed that the overall conclusions derived from Bayes Factors and p-values  
337 were quite similar, highlighting that theoretical considerations should be the deciding factor  
338 when choosing a statistical approach to analyze neural time-series data. In the decoding  
339 context, p-values afford a dichotomous decision of whether there is enough evidence to reject  
340 the hypothesis that decoding is at chance at a given timepoint. Rejecting the null hypothesis  
341 is decoupled from any prior beliefs or theories (Dienes, 2011) and is linked to an accepted  
342 overall error rate such as  $\alpha = 0.05$ . However, they allow us to test for the presence of an effect  
343 at a given timepoint using widely accepted thresholds for evidence. While Bayes Factors can  
344 in principle be thresholded to draw dichotomous conclusions, one of the added benefits of  
345 Bayes Factors over p-values is the ability to quantify the evidence. Another useful benefit of  
346 using Bayes Factors to analyse time-series decoding data is that Bayes Factors allow us to  
347 accrue evidence for above-chance as well as at-chance decoding. For time-series analyses  
348 in particular, this is a useful feature as the time period prior to stimulus onset can be considered  
349 as a control period where we would expect evidence for the null hypothesis. Testing both  
350 hypotheses simultaneously can also be a beneficial feature when the research question  
351 involves hypotheses predicting certain time-periods without any information in the neural  
352 signal (e.g., “X happens before Y” versus “Y happens before X”). Thus, depending on the  
353 research question it may be clear which statistical approach suits the time-series decoding  
354 analysis best. Otherwise, as overall conclusions do not differ, Bayes Factors and p-values can  
355 be used in a complementary way to provide quantifiable evidence for and against the tested

356 hypotheses as well as definitive decisions (see also Lakens et al., 2020; van Dongen et al.,  
357 2019; Wagenmakers et al., 2018).

358

359 Through our results, we provide an empirical, straightforward guide to help implement Bayes  
360 Factors and demonstrate the extent of practical benefits when using Bayes Factors for time-  
361 series neural decoding. Using a data-driven approach, we showed which analysis parameters  
362 are most suitable for statistical assessment of time-series decoding data with Bayes Factors.  
363 While the Bayes Factors in our example MEG decoding dataset were robust against changes  
364 in the predefined width of the prior, defining the prior range so that there is a gap between  $H_a$   
365 and  $H_0$  was critical for finding evidence for the  $H_0$ . This strong effect of the prior range on the  
366 resulting Bayes Factors is particularly relevant in the decoding context, as classification  
367 accuracies under the null are not symmetrically distributed around chance (cf. Allefeld et al.,  
368 2016). Thus, a gap between  $H_0$  and the lower bound of  $H_a$  ensures that small above-chance  
369 classification accuracies are not treated as evidence for  $H_a$ . Furthermore, we systematically  
370 varied dataset size and showed that using Bayes Factors for time-series decoding data is  
371 particularly beneficial when there is limited, noisy data such as in a piloting scenario, as  
372 quantifiable evidence for one hypothesis over another gives a stronger sense of whether it is  
373 worth pursuing the research question with the piloted design, or make changes (e.g., modify  
374 trial numbers or add/remove conditions). Finally, Bayes Factors can be calculated sequentially  
375 while evidence accumulation is monitored to stop once a criterion is reached (Dienes, 2011;  
376 Rouder, 2014), which can save resources and avoid underpowered studies (Wagenmakers et  
377 al., 2018).

378

379 An open question is to what extent our parameter choices generalize to different paradigms,  
380 analysis approaches, and modalities. The Bayes Factor parameters used here were optimized  
381 for time-series decoding. It is in principle possible to use Bayes Factors in a similar way to  
382 analyse other time-series data such as event related potentials, oscillations or regressions,  
383 however, the Bayes Factor parameters might have to be adjusted. Similarly, the analysis  
384 pipeline discussed here could be extended to other neural decoding modalities such as fMRI  
385 (see e.g., Moerel, Rich, et al., 2021). Pilot data or analyses of previous data can be used to  
386 examine how parameters have to be modified in order to get sensible results.

387

388 A final consideration is the multiple comparisons problem arising from statistically testing many  
389 time points. When using Bayes Factors, as long as the evidence for each hypothesis is  
390 interpreted at face value (and not thresholded for 'significance'), we do not need to control for  
391 multiple comparisons (Dienes, 2011, 2016a; Świątkowski & Carrier, 2020). That is because  
392 once we have established a prior and collected the data, we examine how much we have to

393 adjust our prior beliefs given the data and compare the adjustment required for both  
394 hypotheses. This idea is not related to overall error rates and thus does not change if we  
395 sample data sequentially or run multiple tests (Dienes, 2016a). If a research question strongly  
396 depends on a dichotomous decision on multiple tests, then we advise to report corrected p-  
397 values (for which correction methods are well established) alongside the Bayes Factors.

398

399 In conclusion, we have provided an empirically-driven guide on how to use and interpret Bayes  
400 Factors for time-series neuroimaging decoding data. We show that Bayes Factors bring  
401 several advantages to interpreting time-series decoding results such as quantifiable evidence  
402 and an ability to compare evidence for above-chance with evidence for at-chance decoding.  
403 We hope this guide, and the accompanying example code  
404 ([https://github.com/LinaTeichmann1/BFF\\_repo](https://github.com/LinaTeichmann1/BFF_repo)) can serve as a starting point to incorporate  
405 Bayesian statistics to existing analysis pipelines.

406

## 407 References

- 408 Allefeld, C., Görden, K., & Haynes, J.-D. (2016). Valid population inference for information-  
409 based imaging: From the second-level t-test to prevalence inference. *Neuroimage*,  
410 *141*, 378–392.
- 411 Carlson, T. A., Grootswagers, T., & Robinson, A. K. (2019). An introduction to time-resolved  
412 decoding analysis for M/EEG. *ArXiv Preprint ArXiv:1905.04820*.
- 413 Contini, E. W., Wardle, S. G., & Carlson, T. A. (2017). Decoding the time-course of object  
414 recognition in the human brain: From visual features to categorical decisions.  
415 *Neuropsychologia*. <https://doi.org/10.1016/j.neuropsychologia.2017.02.013>
- 416 Dienes, Z. (2011). Bayesian versus orthodox statistics: Which side are you on? *Perspectives*  
417 *on Psychological Science*, *6*(3), 274–290.
- 418 Dienes, Z. (2014). Using Bayes to get the most out of non-significant results. *Frontiers in*  
419 *Psychology*, *5*, 781.
- 420 Dienes, Z. (2016a). How Bayes factors change scientific practice. *Journal of Mathematical*  
421 *Psychology*, *72*, 78–89.
- 422 Dienes, Z. (2016b). How Bayes factors change scientific practice. *Journal of Mathematical*  
423 *Psychology*, *72*, 78–89. <https://doi.org/10.1016/j.jmp.2015.10.003>
- 424 Foster, E. D., & Deardorff, A. (2017). Open Science Framework (OSF). *Journal of the*  
425 *Medical Library Association : JMLA*, *105*(2), 203–206.  
426 <https://doi.org/10.5195/jmla.2017.88>
- 427 Grootswagers, T., Robinson, A. K., & Carlson, T. A. (2019a). The representational dynamics  
428 of visual objects in rapid serial visual processing streams. *NeuroImage*, *188*, 668–  
429 679.
- 430 Grootswagers, T., Robinson, A. K., & Carlson, T. A. (2019b). The representational dynamics  
431 of visual objects in rapid serial visual processing streams. *NeuroImage*, *188*, 668–  
432 679. <https://doi.org/10.1016/j.neuroimage.2018.12.046>



- 433 Grootswagers, T., Robinson, A. K., Shatek, S. M., & Carlson, T. A. (2019). Untangling  
434 featural and conceptual object representations. *NeuroImage*, 202, 116083.  
435 <https://doi.org/10.1016/j.neuroimage.2019.116083>
- 436 Grootswagers, T., Robinson, A. K., Shatek, S. M., & Carlson, T. A. (2021). The neural  
437 dynamics underlying prioritisation of task-relevant information. *Neurons, Behavior,*  
438 *Data Analysis, and Theory*, 5(1), 1–17. <https://doi.org/10.51628/001c.21174>
- 439 Grootswagers, T., Wardle, S. G., & Carlson, T. A. (2017). Decoding Dynamic Brain Patterns  
440 from Evoked Responses: A Tutorial on Multivariate Pattern Analysis Applied to Time  
441 Series Neuroimaging Data. *Journal of Cognitive Neuroscience*, 29(4), 677–697.  
442 [https://doi.org/10.1162/jocn\\_a\\_01068](https://doi.org/10.1162/jocn_a_01068)
- 443 Jeffreys, H. (1939). The Theory of Probability. *The Theory of Probability*.
- 444 Jeffreys, H. (1935). Some tests of significance, treated by the theory of probability.  
445 *Mathematical Proceedings of the Cambridge Philosophical Society*, 31(2), 203–222.
- 446 Kaiser, D., Moeskops, M. M., & Cichy, R. M. (2018). Typical retinotopic locations impact the  
447 time course of object coding. *NeuroImage*.  
448 <https://doi.org/10.1016/j.neuroimage.2018.05.006>
- 449 Keysers, C., Gazzola, V., & Wagenmakers, E.-J. (2020). Using Bayes factor hypothesis  
450 testing in neuroscience to establish evidence of absence. *Nature Neuroscience*,  
451 23(7), 788–799.
- 452 Lakens, D., McLatchie, N., Isager, P. M., Scheel, A. M., & Dienes, Z. (2020). Improving  
453 inferences about null effects with Bayes factors and equivalence tests. *The Journals*  
454 *of Gerontology: Series B*, 75(1), 45–57.
- 455 Ly, A., Verhagen, J., & Wagenmakers, E.-J. (2016). Harold Jeffreys’s default Bayes factor  
456 hypothesis tests: Explanation, extension, and application in psychology. *Journal of*  
457 *Mathematical Psychology*, 72, 19–32.
- 458 Mai, A.-T., Grootswagers, T., & Carlson, T. A. (2019). In search of consciousness:  
459 Examining the temporal dynamics of conscious visual perception using MEG time-  
460 series data. *Neuropsychologia*, 129, 310–317.  
461 <https://doi.org/10.1016/j.neuropsychologia.2019.04.015>
- 462 Moerel, D., Grootswagers, T., Robinson, A. K., Shatek, S. M., Woolgar, A., Carlson, T. A., &  
463 Rich, A. N. (2021). Undivided attention: The temporal effects of attention dissociated  
464 from decision, memory, and expectation. *BioRxiv*, 2021.05.24.445376.  
465 <https://doi.org/10.1101/2021.05.24.445376>
- 466 Moerel, D., Rich, A. N., & Woolgar, A. (2021). Selective attention and decision-making have  
467 separable neural bases in space and time. *BioRxiv*, 2021.02.28.433294.  
468 <https://doi.org/10.1101/2021.02.28.433294>
- 469 Morey, R. D., Romeijn, J.-W., & Rouder, J. N. (2016). The philosophy of Bayes factors and  
470 the quantification of statistical evidence. *Journal of Mathematical Psychology*, 72, 6–  
471 18.
- 472 Morey, R. D., Rouder, J. N., Jamil, T., & Morey, M. R. D. (2015). Package ‘bayesfactor.’  
473 *URLh* <http://Cran/r-Projectorg/Web/Packages/BayesFactor/BayesFactor.Pdf> i  
474 (Accessed 1006 15).
- 475 Oosterhof, N. N., Connolly, A. C., & Haxby, J. V. (2016). CoSMoMvPA: Multi-modal  
476 multivariate pattern analysis of neuroimaging data in Matlab/GNU Octave. *Frontiers*  
477 *in Neuroinformatics*, 10. <https://www.ncbi.nlm.nih.gov/pmc/articles/PMC4956688/>
- 478 Pantazis, D. (2020). Decoding cognitive function with magnetoencephalography. *Fifty Years*  
479 *of Magnetoencephalography: Beginnings, Technical Advances, and Applications*, 19,  
480 278.

- 481 Proklova, D., Kaiser, D., & Peelen, M. V. (2019). MEG sensor patterns reflect perceptual but  
482 not categorical similarity of animate and inanimate objects. *NeuroImage*, *193*, 167–  
483 177. <https://doi.org/10.1016/j.neuroimage.2019.03.028>
- 484 Robinson, A. K., Grootswagers, T., & Carlson, T. A. (2019). The influence of image masking  
485 on object representations during rapid serial visual presentation. *NeuroImage*, *197*,  
486 224–231. <https://doi.org/10.1016/j.neuroimage.2019.04.050>
- 487 Robinson, A. K., Grootswagers, T., Shatek, S. M., Gerboni, J., Holcombe, A., & Carlson, T.  
488 A. (2021). Overlapping neural representations for the position of visible and imagined  
489 objects. *Neurons, Behavior, Data Analysis, and Theory*, *4*(1), 1–28.  
490 <https://doi.org/10.51628/001c.19129>
- 491 Rouder, J. N. (2014). Optional stopping: No problem for Bayesians. *Psychonomic Bulletin &*  
492 *Review*, *21*(2), 301–308.
- 493 Rouder, J. N., Speckman, P. L., Sun, D., Morey, R. D., & Iverson, G. (2009). Bayesian t tests  
494 for accepting and rejecting the null hypothesis. *Psychonomic Bulletin & Review*,  
495 *16*(2), 225–237.
- 496 Świątkowski, W., & Carrier, A. (2020). There is Nothing Magical about Bayesian Statistics:  
497 An Introduction to Epistemic Probabilities in Data Analysis for Psychology Starters.  
498 *Basic and Applied Social Psychology*, *42*(6), 387–412.
- 499 Teichmann, L., Grootswagers, T., Carlson, T., & Rich, A. N. (2018). Decoding digits and dice  
500 with magnetoencephalography: Evidence for a shared representation of magnitude.  
501 *Journal of Cognitive Neuroscience*, *30*(7), 999–1010.
- 502 Teichmann, L., Grootswagers, T., Carlson, T., & Rich, A. N. (2019). Seeing versus knowing:  
503 The temporal dynamics of real and implied colour processing in the human brain.  
504 *NeuroImage*, *200*, 373.
- 505 Teichmann, L., Quek, G. L., Robinson, A. K., Grootswagers, T., Carlson, T. A., & Rich, A. N.  
506 (2020). The influence of object-colour knowledge on emerging object representations  
507 in the brain. *Journal of Neuroscience*.
- 508 van Dongen, N. N., van Doorn, J. B., Gronau, Q. F., van Ravenzwaaij, D., Hoekstra, R.,  
509 Haucke, M. N., Lakens, D., Hennig, C., Morey, R. D., & Homer, S. (2019). Multiple  
510 perspectives on inference for two simple statistical scenarios. *The American*  
511 *Statistician*, *73*(sup1), 328–339.
- 512 Wagenmakers, E.-J., Marsman, M., Jamil, T., Ly, A., Verhagen, J., Love, J., Selker, R.,  
513 Gronau, Q. F., Šmíra, M., & Epskamp, S. (2018). Bayesian inference for psychology.  
514 Part I: Theoretical advantages and practical ramifications. *Psychonomic Bulletin &*  
515 *Review*, *25*(1), 35–57.
- 516 Wagenmakers, E.-J., Morey, R. D., & Lee, M. D. (2016). Bayesian benefits for the pragmatic  
517 researcher. *Current Directions in Psychological Science*, *25*(3), 169–176.
- 518
- 519
- 520
